# Supplementary material
Source: PubMed Central journal article supplement (PMC1955764)
Supplement: NIHMS26734-supplement-S2.pdf [file NIHMS26734-supplement-S2.pdf]

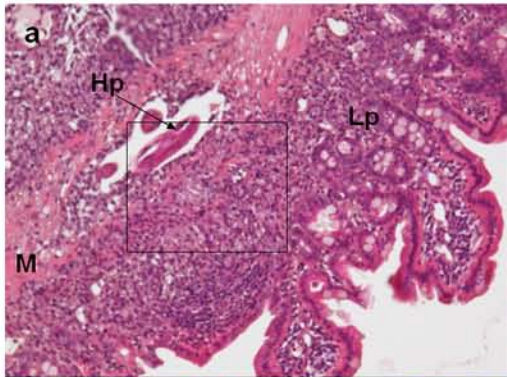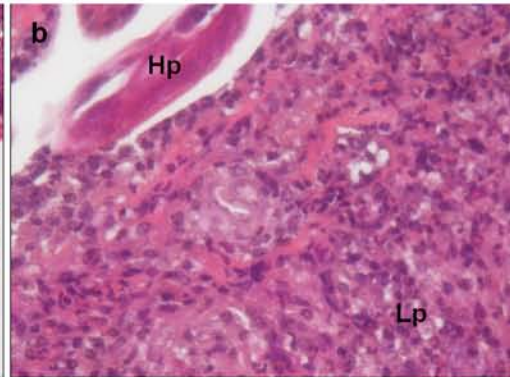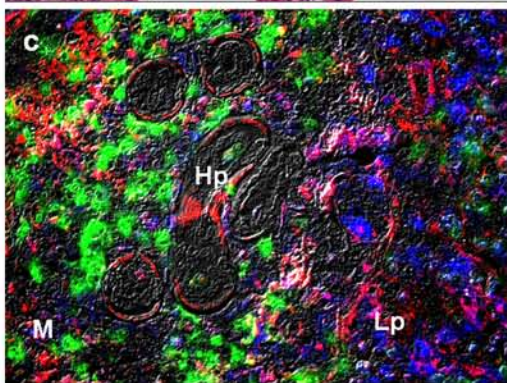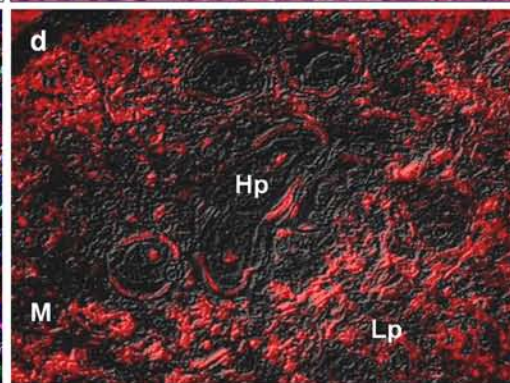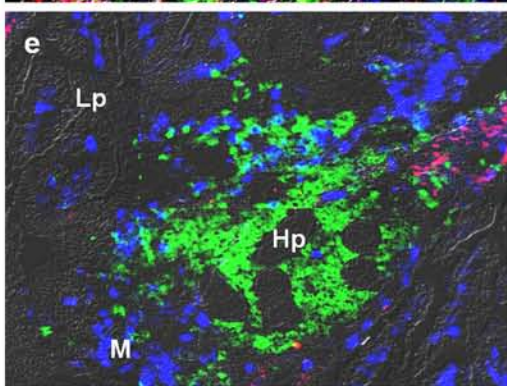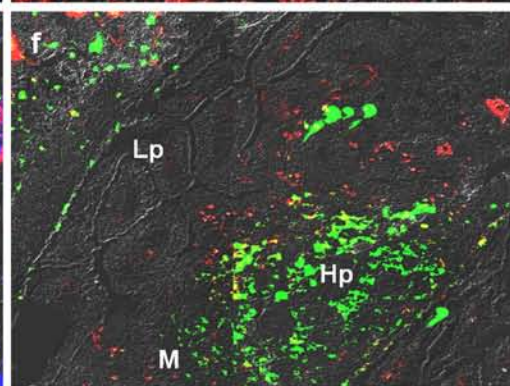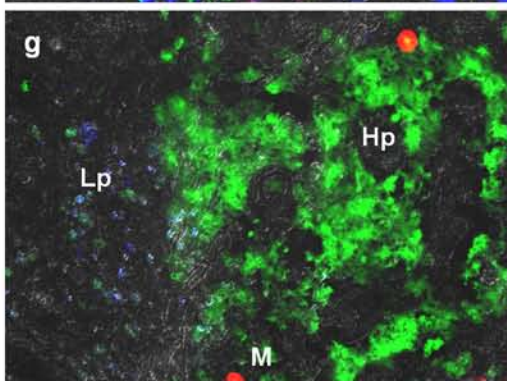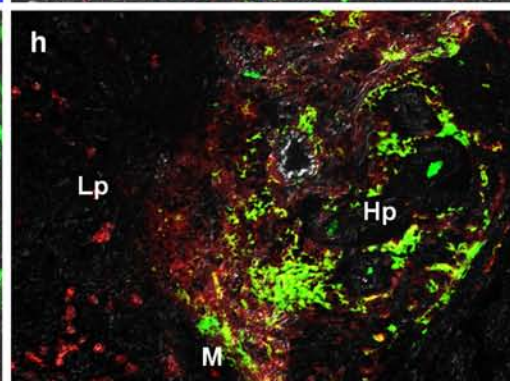

**Supplementary figure 2.** An inflammatory Th2 microenvironment develops around *Hp* larvae 4 days after challenge. H&E stained images of the host:parasite interface show infiltration of inflammatory cells at 100x (**a**) and 400x (**b**) magnification. **c.** IL-4R $\alpha^{\text{hi}}$  cells (red) do not stain positive for Gr-1 (green) or CD4 (blue). **d.** A serial tissue section singly stained for IL-4R $\alpha^{\text{hi}}$  (red) encircles the parasite. The host:parasite interface in challenged IL-4 $^{-/-}$  mice (**e, f**) includes Gr-1 $^{+}$  neutrophils (**e**, green) and CD4 $^{+}$  T cells (**e**, blue), but reduced infiltration of IL-4R $\alpha^{\text{hi}}$  (**e**, red), F4/80 $^{+}$  (**f**, red) or CD206 $^{+}$  (**f**, green) cells. Tissue sections taken 4 days after challenge in mice treated with anti-CD4 Ab (**g, h**) show the accumulation of Gr1 $^{+}$  neutrophils (**g**, green), but a marked reduction in CD4 $^{+}$  T cells (**g**, blue) and IL-4R $^{\text{hi}}$  cells (**g**, red). A serial section shows reduced numbers of F4/80 $^{+}$  (**h**, red) and CD206 $^{+}$  (**h**, green) cells.
