# Supplementary material
Source: PubMed Central journal article supplement (PMC1955764)
Supplement: NIHMS26734-supplement-S3.pdf [file NIHMS26734-supplement-S3.pdf]

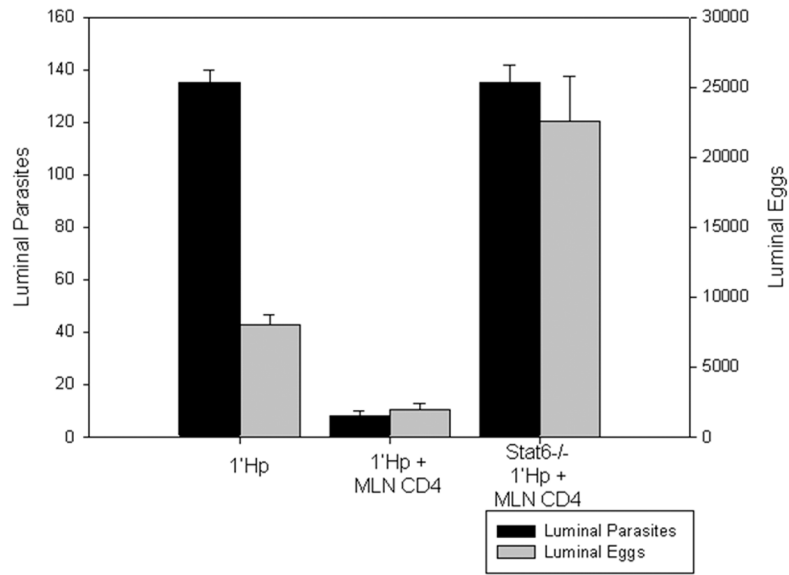

**Supplemental figure 3.** CD4<sup>+</sup> T cells from Hp primed and drug cured mice can transfer protection to wild type, but not stat6<sup>-/-</sup> mice. 5x10<sup>5</sup> CD4<sup>+</sup> T cells from MLN of primed and cured mice were injected i.v. into wild type or stat6<sup>-/-</sup> recipients. Two days later, the recipient mice were infected with Hp, and parasite and egg burdens determined 14 days post infection. Bars represent mean and standard error for 5 mice per treatment group.
