# Supplementary material
Source: PubMed Central journal article supplement (PMC1955764)
Supplement: NIHMS26734-supplement-S4.pdf [file NIHMS26734-supplement-S4.pdf]

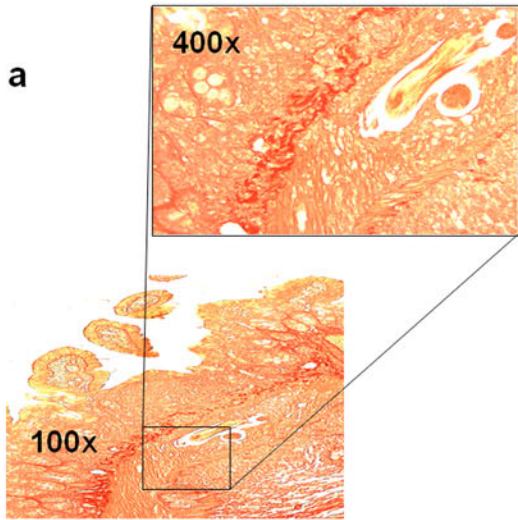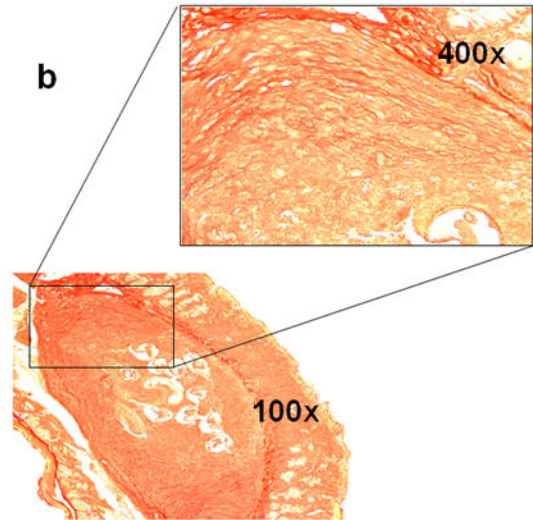

**Supplemental figure 4.** Collagen is deposited around the parasite at later stages of a challenge infection and is associated with the Th2 inflammatory response. Tissue sections of the host:parasite interface, stained with picosirius red for fibrosis, display red strands, indicative of collagen, extending into the muscularis region and encircling the parasite 12 days **(b)**, but not 4 days **(a)** after challenge.
